# Supplementary material for: Avelumab Plus Talazoparib in Patients With Advanced Solid Tumors: The JAVELIN PARP Medley Nonrandomized Controlled Trial
Source: PubMed Central journal article supplement — JAMA Oncol. 2022 Nov 17;9(1):40–50. doi: 10.1001/jamaoncol.2022.5228 (PMC9673022; doi:10.1001/jamaoncol.2022.5228), 2022-11-17
Supplement: jamaoncol-e225228-s003.pdf [file jamaoncol-e225228-s003.pdf]

## Data Sharing Statement

Yap. Avelumab Plus Talazoparib in Patients With Advanced Solid Tumors. *JAMA Oncol.*  
Published November 17, 2022. doi:10.1001/jamaoncol.2022.5228

### Data

**Data available:** Yes

**Data types:** Deidentified participant data

**How to access data:** Upon request, and subject to review, Pfizer will provide the data that support the findings of this study. Subject to certain criteria, conditions and exceptions, Pfizer may also provide access to the related individual de-identified participant data. See <https://www.pfizer.com/science/clinical-trials/trial-data-and-results> for more information.

**When available:** With publication

### Supporting Documents

**Document types:** Other (please specify)

**Additional Information:** Supplementary Data

**How to access documents:** The supplementary data should be published along with the manuscript

**When available:** With publication

### Additional Information

**Who can access the data:** Anyone requesting the data

**Types of analyses:** For any purpose

**Mechanisms of data availability:** With investigator support
